# Supplementary material for: Leishmania Mitochondrial Peroxiredoxin Plays a Crucial Peroxidase-Unrelated Role during Infection: Insight into Its Novel Chaperone Activity
Source: PubMed Central journal article supplement (PMC3203189; doi:10.1371/journal.ppat.1002325), 2011-10-27
Supplement: ppat.1002325.s001.pdf [file ppat.1002325.s001.pdf]

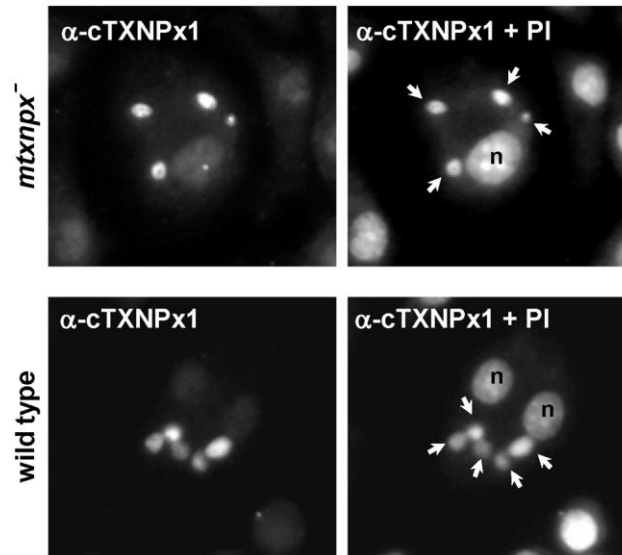

**Figure S1. mTXNPx depletion has no impact on the capacity of *L. infantum* to invade macrophages and differentiate into amastigotes.**

Fluorescence microscopy images showing monolayers of peritoneal macrophages from C57BL/6 mice 24 hrs after infection with *mtxnpx*<sup>-</sup> (*upper panels*) and with wild type *L. infantum* (*lower panels*). For parasite detection, the anti-cTXNPx1 antibody [8], which specifically recognizes *Leishmania* antigens, was used (*left*). Merging with propidium iodide (PI) is also shown (*right*). Arrows point to intracellular parasites. Images were acquired at a 200× magnification.
