# Supplementary material for: Leishmania Mitochondrial Peroxiredoxin Plays a Crucial Peroxidase-Unrelated Role during Infection: Insight into Its Novel Chaperone Activity
Source: PubMed Central journal article supplement (PMC3203189; doi:10.1371/journal.ppat.1002325), 2011-10-27
Supplement: ppat.1002325.s003.pdf [file ppat.1002325.s003.pdf]

**Table S1. List of oligonucleotides employed to generate DNA constructs.**

| Primer name | Primer sequence                                   |
|-------------|---------------------------------------------------|
| P1          | 5'- <i>caccgatcc</i> CTTCGATCAAGTTAACCGCC-3'      |
| P2          | 5'- <i>caccgctcgag</i> AGACGGCGGAGCATCGTGT-3'     |
| P3          | 5'- <i>gcgggtacc</i> ATGTCTTTCACCTATAACACATG-3'   |
| P4          | 5'- <i>acgggtacc</i> TGTTTGATCTGTGCGACTGGG-3'     |
| P5          | 5'- <i>cgcgGATCCGGGTGGCAGTATC</i> -3'             |
| P6          | 5'- <i>cggaggatc</i> GCTTCTCAAAGTCGGCGT-3'        |
| P7          | 5'- <i>gcgggtacc</i> GTGTGCTGATCGAGGAAT-3'        |
| P8          | 5'- <i>gcgggtacc</i> GAGCTCAAAGCTCGCAT-3'         |
| P9          | 5'-CTTCACCTTCGTTT <u>CCCCGACCGAGATCA</u> -3'      |
| P10         | 5'-TGATCTCGGTCCGGG <u>GAAACGAAGGTGAAG</u> -3'     |
| P11         | 5'- <i>ccgcgcacatatg</i> AATCTGGACTATCAGATGTAC-3' |
| P12         | 5'- <i>caccgctcgag</i> TCACATGTTCTTCTCGAAAAAC-3'  |

Clamp sequences are indicated in lower case, restriction sites in italic and mutations used to generate the mTXNPxC81S muttein underlined.
