# Supplementary material for: Leishmania Mitochondrial Peroxiredoxin Plays a Crucial Peroxidase-Unrelated Role during Infection: Insight into Its Novel Chaperone Activity
Source: PubMed Central journal article supplement (PMC3203189; doi:10.1371/journal.ppat.1002325), 2011-10-27
Supplement: ppat.1002325.s004.pdf [file ppat.1002325.s004.pdf]

**Table S2. Distribution of organs testing negative and positive in the limiting dilution assays used to generate the plot in Figure 2 of the main text.**

| Time after infection | Parasite strain                              | Liver      |          |                  |                         | Spleen     |          |                  |                         |
|----------------------|----------------------------------------------|------------|----------|------------------|-------------------------|------------|----------|------------------|-------------------------|
|                      |                                              | LDA result |          | Statistical test |                         | LDA result |          | Statistical test |                         |
|                      |                                              | Negative   | Positive | Chi-square       | Fisher's <sup>(a)</sup> | Negative   | Positive | Chi-square       | Fisher's <sup>(a)</sup> |
| 2 wks                | wild type                                    | 17%        | 83%      | n.s.             | n.s.                    | 17%        | 83%      | n.s.             | n.s.                    |
|                      | <i>mtxnp<sup>x-</sup></i>                    | 31%        | 69%      |                  |                         | 19%        | 81%      |                  |                         |
|                      | <i>mtxnp<sup>x-</sup>/+mTXNP<sub>x</sub></i> | 50%        | 50%      |                  |                         | 50%        | 50%      |                  |                         |
| 4 wks                | wild type                                    | 13%        | 87%      | p<0.05 *         | p<0.05                  | 13%        | 87%      | p<0.05 *         | p<0.05                  |
|                      | <i>mtxnp<sup>x-</sup></i>                    | 71%        | 29%      |                  |                         | 50%        | 50%      |                  |                         |
|                      | <i>mtxnp<sup>x-</sup>/+mTXNP<sub>x</sub></i> | 8%         | 92%      |                  |                         | 8%         | 92%      |                  |                         |
| 8 wks                | wild type                                    | 15%        | 85%      | p<0.05           | p<0.05                  | 15%        | 85%      | p<0.05           | p<0.05                  |
|                      | <i>mtxnp<sup>x-</sup></i>                    | 95%        | 5%       |                  |                         | 95%        | 5%       |                  |                         |
|                      | <i>mtxnp<sup>x-</sup>/+mTXNP<sub>x</sub></i> | 20%        | 80%      |                  |                         | 7%         | 93%      |                  |                         |
| 14 wks               | wild type                                    | 0%         | 100%     | p<0.05 *         | p<0.05                  | 0%         | 100%     | p<0.05 *         | p<0.05                  |
|                      | <i>mtxnp<sup>x-</sup></i>                    | 100%       | 0%       |                  |                         | 100%       | 0%       |                  |                         |
|                      | <i>mtxnp<sup>x-</sup>/+mTXNP<sub>x</sub></i> | 40%        | 60%      |                  |                         | 20%        | 80%      |                  |                         |

<sup>(a)</sup> Comparison between *mtxnp<sup>x-</sup>* and wild type plus *mtxnp<sup>x-</sup>/+mTXNP<sub>x</sub>*; \* more than 25 % of cells with expected values <5; n.s., no statistical significance (*i.e.* p>0.05).
