# Supplementary material for: Leishmania Mitochondrial Peroxiredoxin Plays a Crucial Peroxidase-Unrelated Role during Infection: Insight into Its Novel Chaperone Activity
Source: PubMed Central journal article supplement (PMC3203189; doi:10.1371/journal.ppat.1002325), 2011-10-27
Supplement: ppat.1002325.s005.pdf [file ppat.1002325.s005.pdf]

**Table S3. Distribution of organs testing negative and positive in limiting dilution assays used to generate the plot in Figure 3E of the main text.**

| Mouse strain                                        | Parasite strain                              | Liver      |          |                  |                         | Spleen     |          |                  |                         |
|-----------------------------------------------------|----------------------------------------------|------------|----------|------------------|-------------------------|------------|----------|------------------|-------------------------|
|                                                     |                                              | LDA result |          | Statistical test |                         | LDA result |          | Statistical test |                         |
|                                                     |                                              | Negative   | Positive | Chi-square       | Fisher's <sup>(a)</sup> | Negative   | Positive | Chi-square       | Fisher's <sup>(a)</sup> |
| C57/BL6                                             | wild type                                    | 20%        | 80%      |                  |                         | 10%        | 90%      |                  |                         |
|                                                     | <i>mtxnp<sup>x-</sup></i>                    | 86%        | 14%      | p<0.05 *         | p<0.05                  | 100%       | 0%       | p<0.05 *         | p<0.05                  |
|                                                     | <i>mtxnp<sup>x-</sup>/+mTXNP<sub>x</sub></i> | 10%        | 90%      |                  |                         | 10%        | 90%      |                  |                         |
| B6.p47 <sup>phox<sup>-/-</sup></sup>                | <i>mtxnp<sup>x-</sup></i>                    | 100%       | 0%       | p<0.05 *         | p<0.05                  | 75%        | 25%      | p<0.05 *         | p<0.05                  |
|                                                     | <i>mtxnp<sup>x-</sup>/+mTXNP<sub>x</sub></i> | 0%         | 100%     |                  |                         | 0%         | 100%     |                  |                         |
| B6.RAG2 <sup>-/-</sup> IFN- $\gamma$ <sup>-/-</sup> | wild type                                    | 11%        | 89%      |                  |                         | n.a.       | n.a.     | -                | -                       |
|                                                     | <i>mtxnp<sup>x-</sup></i>                    | 89%        | 11%      | p<0.05 *         | p<0.05                  |            |          |                  |                         |
|                                                     | <i>mtxnp<sup>x-</sup>/+mTXNP<sub>x</sub></i> | 11%        | 89%      |                  |                         |            |          |                  |                         |

<sup>(a)</sup> Comparison between *mtxnp<sup>x-</sup>* and wild type plus *mtxnp<sup>x-</sup>/+mTXNP<sub>x</sub>*; \* more than 25 % of cells with expected values <5; n.a., not analyzed.
