# Supplementary material for: Leishmania Mitochondrial Peroxiredoxin Plays a Crucial Peroxidase-Unrelated Role during Infection: Insight into Its Novel Chaperone Activity
Source: PubMed Central journal article supplement (PMC3203189; doi:10.1371/journal.ppat.1002325), 2011-10-27
Supplement: ppat.1002325.s006.pdf [file ppat.1002325.s006.pdf]

**Table S4. Distribution of organs testing negative and positive in limiting dilution assays used to generate the plot in Figure 4D of the main text.**

| Time after infection | Parasite strain                                  | Liver      |          |                  |                         | Spleen     |          |                  |                         |
|----------------------|--------------------------------------------------|------------|----------|------------------|-------------------------|------------|----------|------------------|-------------------------|
|                      |                                                  | LDA result |          | Statistical test |                         | LDA result |          | Statistical test |                         |
|                      |                                                  | Negative   | Positive | Chi-square       | Fisher's <sup>(a)</sup> | Negative   | Positive | Chi-square       | Fisher's <sup>(a)</sup> |
| 4 wks                | <i>mtxnp<sup>x-</sup></i>                        | 100%       | 0%       |                  |                         | 67%        | 33%      |                  |                         |
|                      | <i>mtxnp<sup>x-</sup>/+mTXNP<sup>x</sup></i>     | 14%        | 86%      | p<0.05 *         | p<0.05                  | 14%        | 86%      | n.s.             | p<0.05                  |
|                      | <i>mtxnp<sup>x-</sup>/+mTXNP<sup>x</sup>C81S</i> | 21%        | 79%      |                  |                         | 21%        | 79%      |                  |                         |
| 8 wks                | <i>mtxnp<sup>x-</sup></i>                        | 100%       | 0%       |                  |                         | 100%       | 0%       |                  |                         |
|                      | <i>mtxnp<sup>x-</sup>/+mTXNP<sup>x</sup></i>     | 43%        | 57%      | p<0.05 *         | p<0.05                  | 29%        | 71%      | p<0.05 *         | p<0.05                  |
|                      | <i>mtxnp<sup>x-</sup>/+mTXNP<sup>x</sup>C81S</i> | 43%        | 57%      |                  |                         | 21%        | 79%      |                  |                         |

<sup>(a)</sup> Comparison between *mtxnp<sup>x-</sup>* and *mtxnp<sup>x-</sup>/+mTXNP<sup>x</sup>* plus *mtxnp<sup>x-</sup>/+mTXNP<sup>x</sup>C81S*; \* more than 25 % of cells with expected values <5; n.s., no statistical significance (i.e. p>0.05).
